# Supplementary material
Source: PubMed Central journal article supplement (PMC5589065)
Supplement: mmc1.pdf [file mmc1.pdf]

YMTHE, Volume 25

## **Supplemental Information**

### **The Circular RNA Interacts with STAT3, Increasing Its Nuclear Translocation and Wound Repair by Modulating Dnmt3a and miR-17 Function**

**Zhen-Guo Yang, Faryal Mehwish Awan, William W. Du, Yan Zeng, Juanjuan Lyu, De Wu, Shaan Gupta, Weining Yang, and Burton B. Yang**

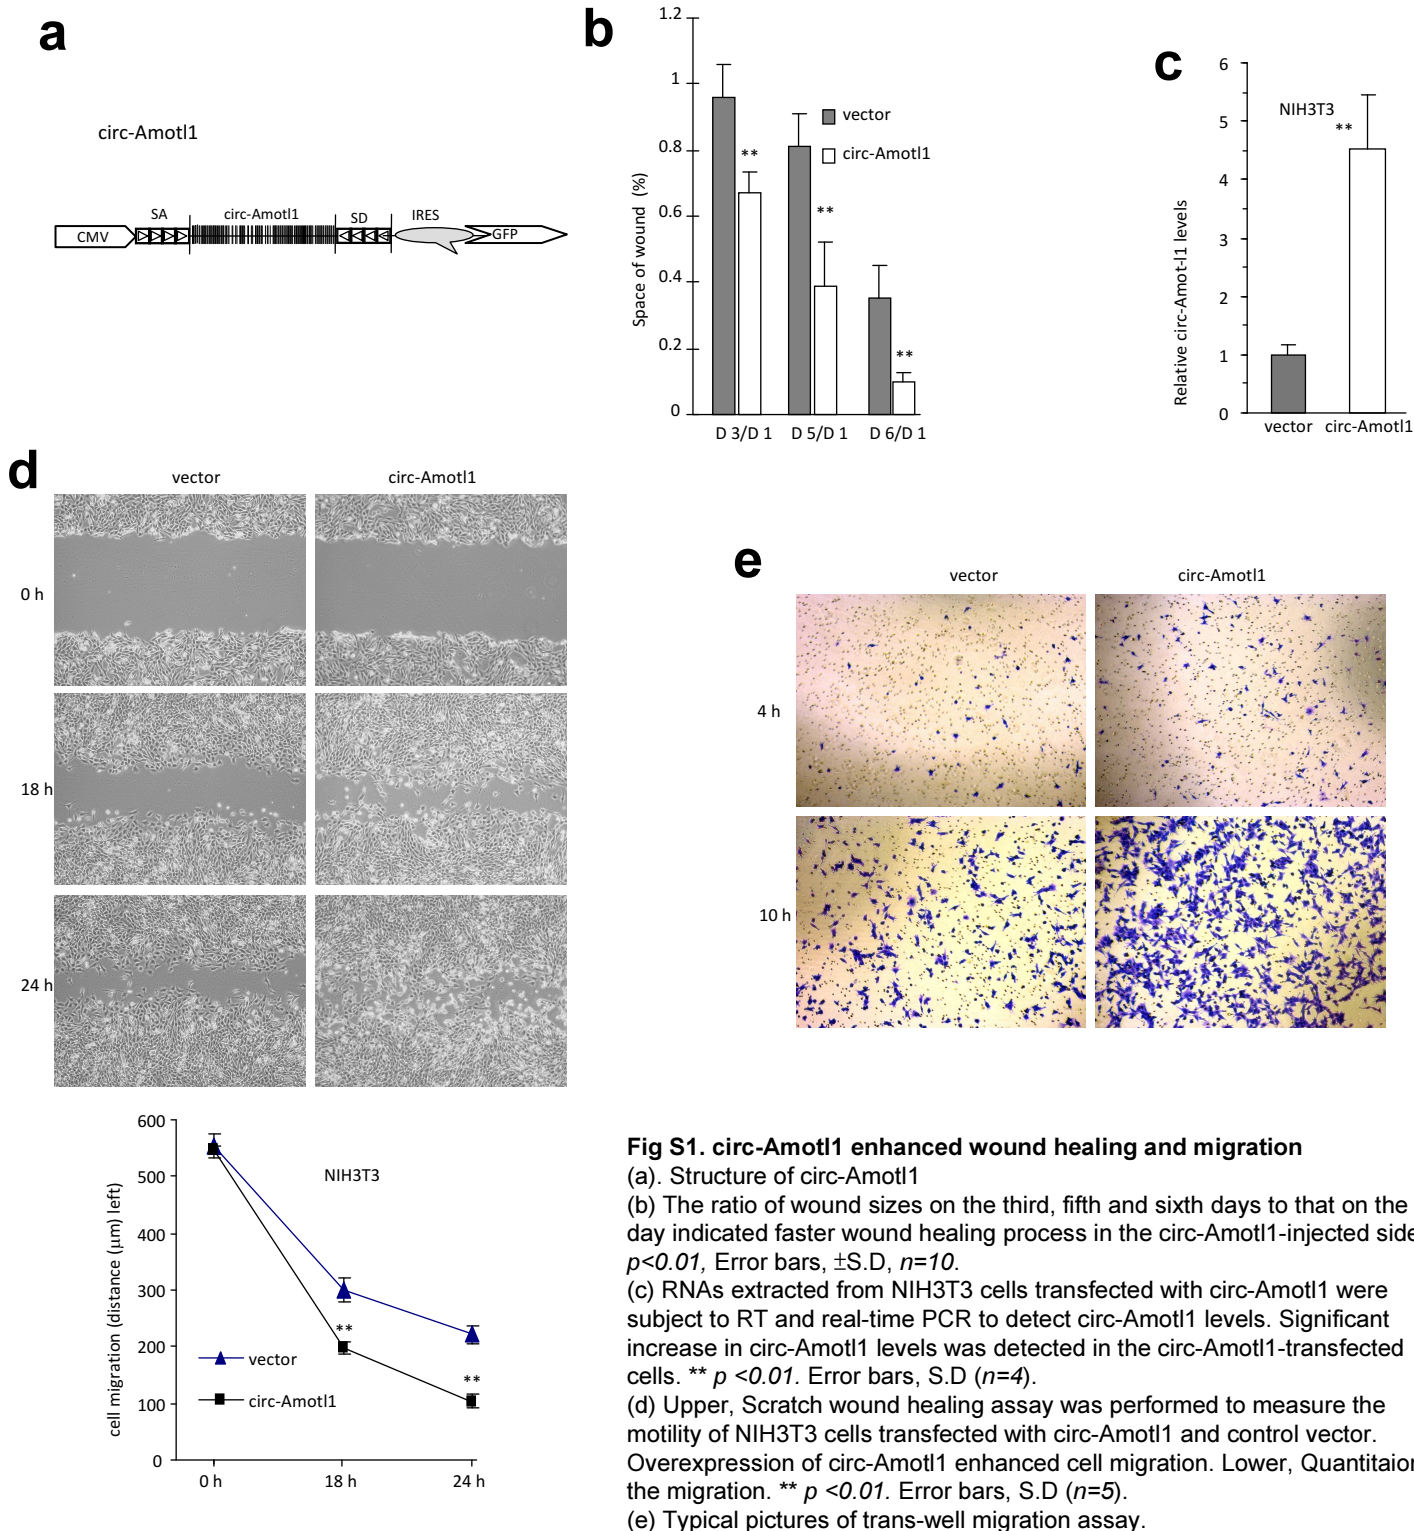

**Fig S1. circ-Amot1 enhanced wound healing and migration**

(a) Structure of circ-Amot1

(b) The ratio of wound sizes on the third, fifth and sixth days to that on the first day indicated faster wound healing process in the circ-Amot1-injected side. \*\*  $p < 0.01$ , Error bars,  $\pm$ S.D,  $n=10$ .

(c) RNAs extracted from NIH3T3 cells transfected with circ-Amot1 were subject to RT and real-time PCR to detect circ-Amot1 levels. Significant increase in circ-Amot1 levels was detected in the circ-Amot1-transfected cells. \*\*  $p < 0.01$ . Error bars, S.D ( $n=4$ ).

(d) Upper, Scratch wound healing assay was performed to measure the motility of NIH3T3 cells transfected with circ-Amot1 and control vector. Overexpression of circ-Amot1 enhanced cell migration. Lower, Quantitation of the migration. \*\*  $p < 0.01$ . Error bars, S.D ( $n=5$ ).

(e) Typical pictures of trans-well migration assay.

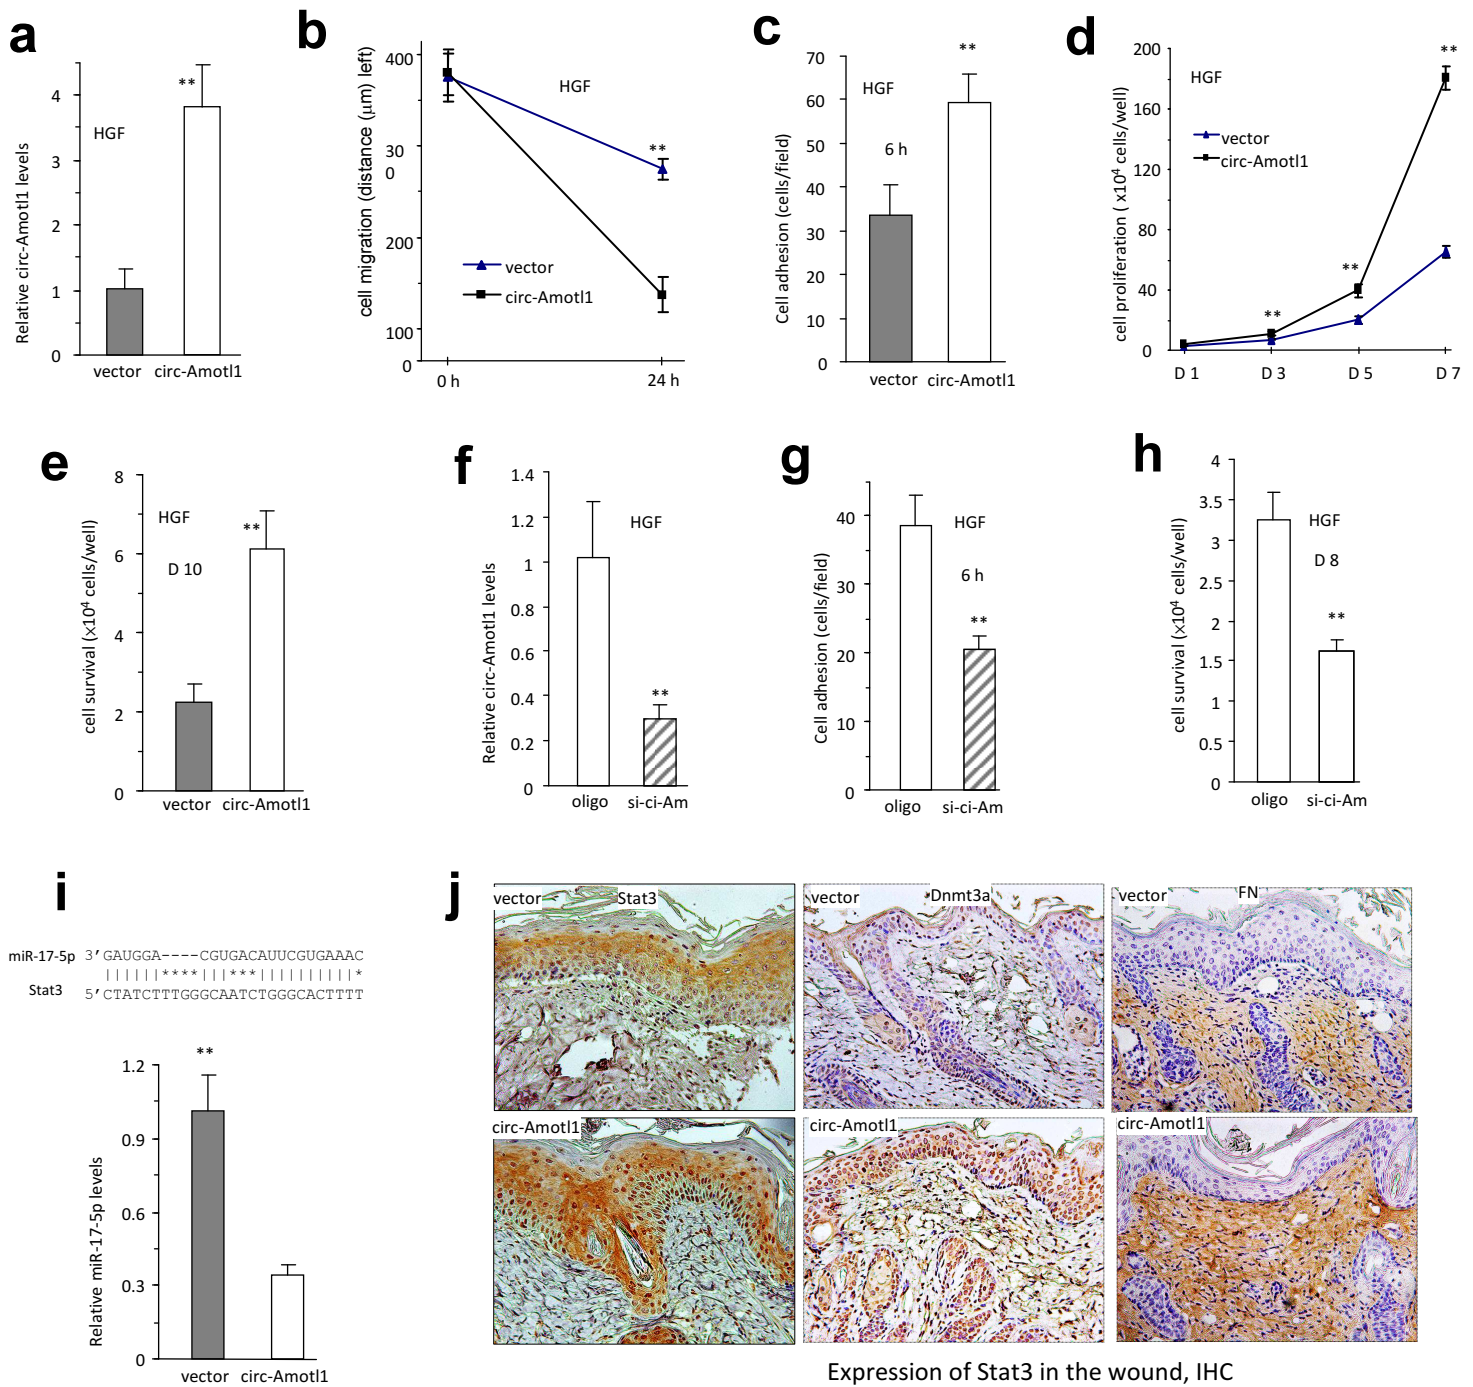

**Fig S2. circ-Amotl1 enhanced cell proliferation, migration, and survival**

(a) RNAs extracted from HGF cells transfected with circ-Amotl1 or control vector were subject to real-time PCR. Up-regulation of circ-Amotl1 was detected in the circ-Amotl1-transfected cells. \*\*  $p < 0.01$ . Error bars, S.D ( $n=4$ ).

(b) Wound healing assay showed that overexpression of circ-Amotl1 increased migration of the HGF cells. \*\*  $p < 0.01$ , Error bars, S.D ( $n=5$ ).

(c) Overexpression of circ-Amotl1 increased HGF cell adhesion.

(d) Cell proliferation assay showed that HGF cells transfected with circ-Amotl1 proliferated faster than the control. \*\*  $p < 0.01$ , Error bars, S.D ( $n=5$ ).

(e) Maintained in serum-free medium for 10 days, HGF cells transfected with circ-Amotl1 displayed increase in survival relative to the control. \*\*  $p < 0.01$ , Error bars, S.D ( $n=5$ ).

(f) Down-regulation of circ-Amotl1 was detected in the siRNA-transfected cells as compared to the control. \*\*  $p < 0.01$ , Error bars, S.D ( $n=4$ ).

(g) Silencing circ-Amotl1 repressed cell adhesion on Petri-dish in HGF cells after 6 h incubation. \*\*  $p < 0.01$ , Error bars, S.D ( $n=5$ ).

(h) Silencing circ-Amotl1 repressed HGF cell survival after being maintained in serum-free medium for 8 days. \*\*  $p < 0.01$ , Error bars, S.D ( $n=5$ ).

(i) Ectopic expression of circ-Amotl1 decreased miR-17-5p expression.

(j) Sections of wound tissues from circ-Amotl1- and control plasmid-injected mice were subject to immunohistochemistry staining. Increased expression of Stat3, Dnmt3a, and fibronectin was detected in circ-Amotl1-injected mice.



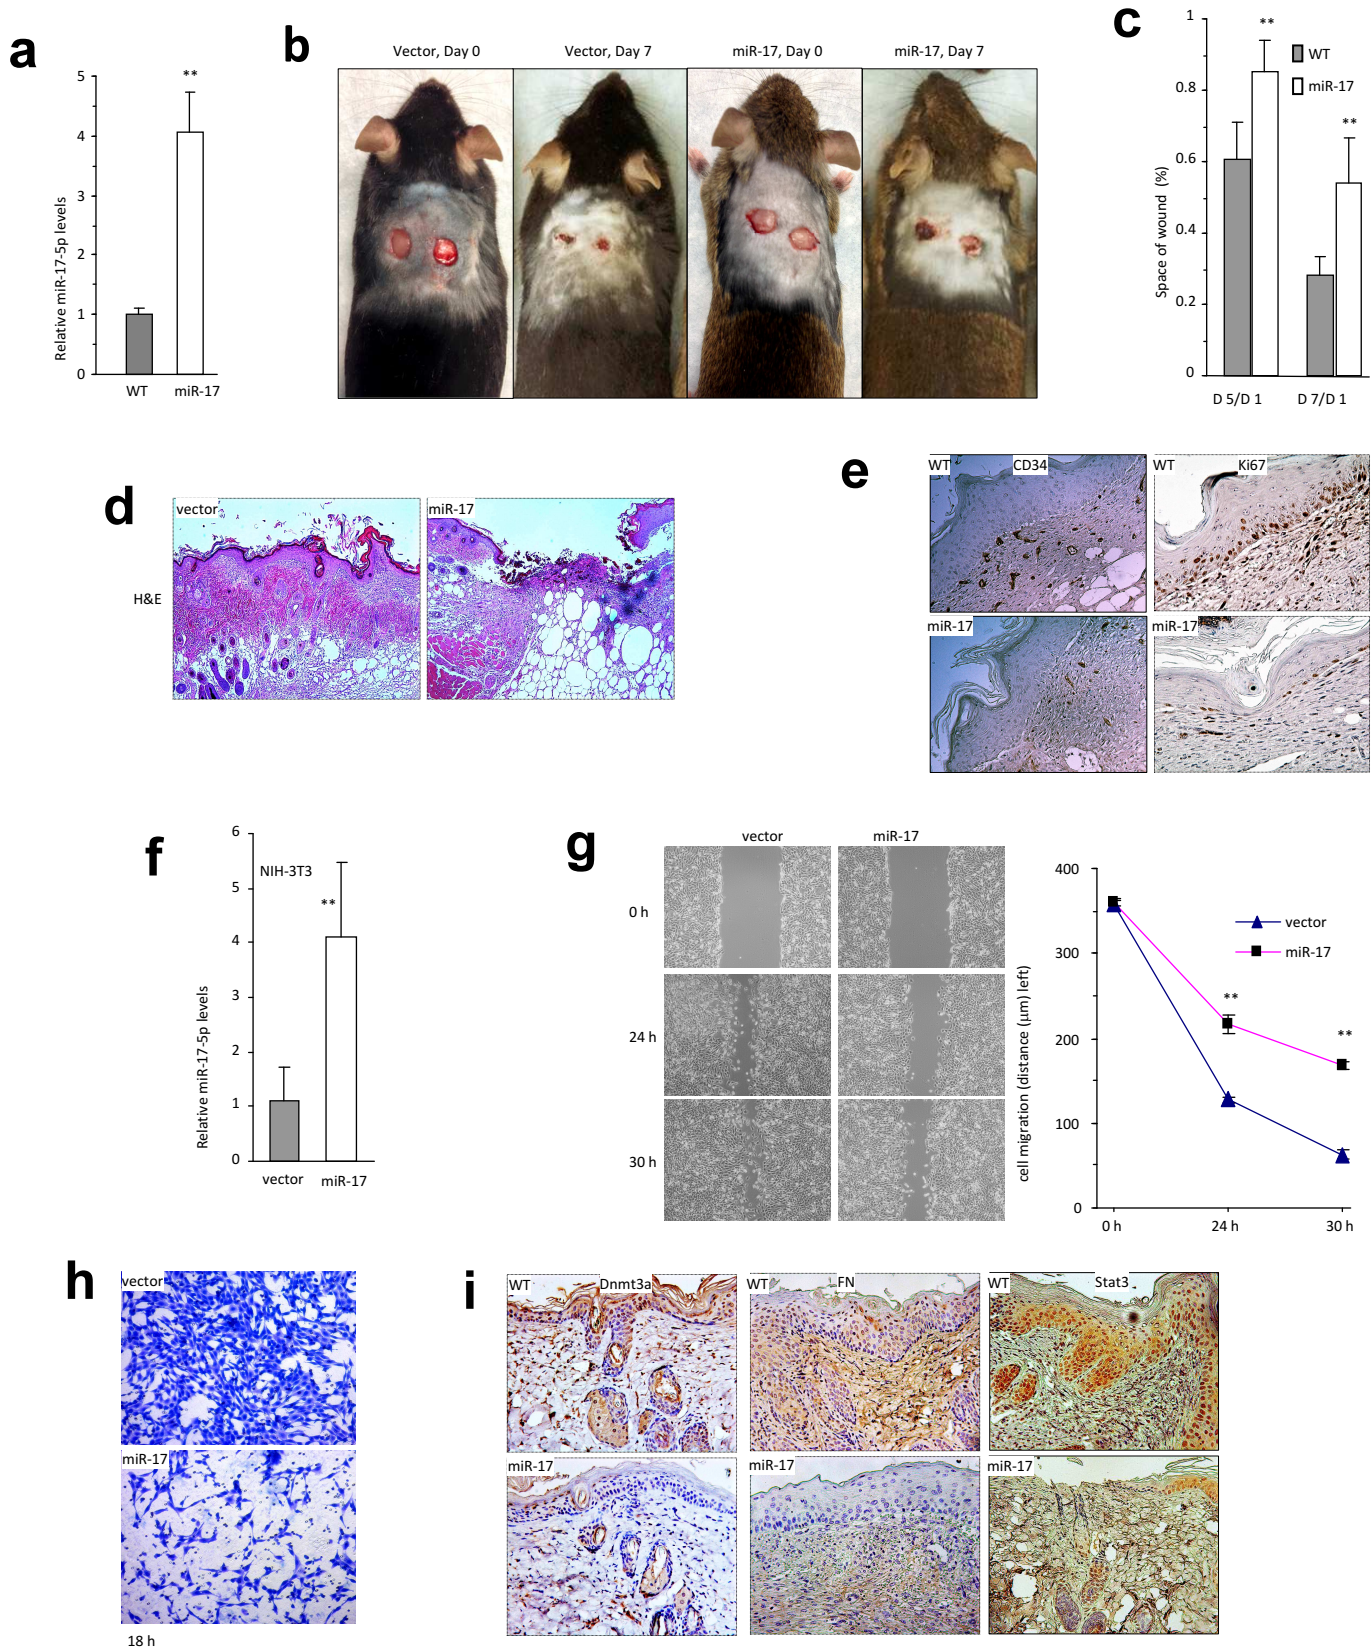

**Fig S3. Mutual regulation of circ-Amotl1 and miR-17-5p.** (a) Wound tissues were subject to real-time PCR to confirm up-regulation of miR-17-5p. (b) Typical pictures were taken from seventh day showing that miR-17 transgenic mice had delayed healing compared to the wild-type group. (c) After mice were slaughtered, wound size was measured by multiplying longest length by greatest width. The ratio of wound sizes on the fifth and seventh day to that on the first day indicated slower wound healing process in the miR-17 transgenic mice relative to controls. (d) Typical pictures of H&E staining showing larger wound in the miR-17 tissue. (e) Immunohistochemistry staining of wound tissues showed decreased levels of CD34 (left) and Ki67 (right). (f) Cell lines stably transfected with miR-17 or the control vector were subject to real-time PCR to confirm up-regulation of miR-17-5p. (g) Left, scratch wound healing assay was performed to measure the motility of NIH3T3 cells transfected with miR-17 and control vector. Overexpression of miR-17 decreased cell migration. Right, Quantitation of the migration. \*\*  $p < 0.01$ . Error bars, S.D ( $n=5$ ). (h) Typical picture of trans-well migration assay. (i) Typical pictures of immunohistochemistry staining showed decreased expression of Dnmt3a, fibronectin, and Stat3 in the miR-17 transgenic mice.



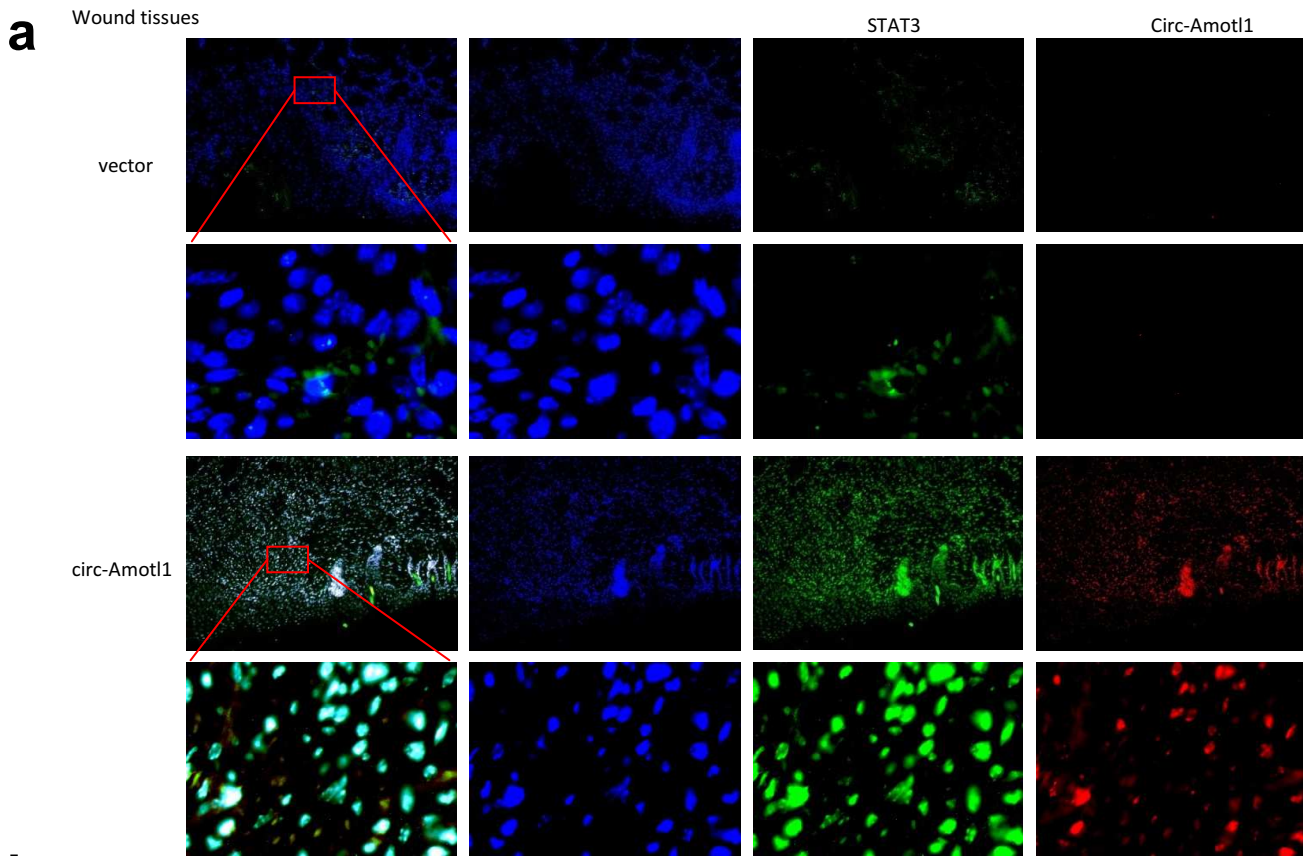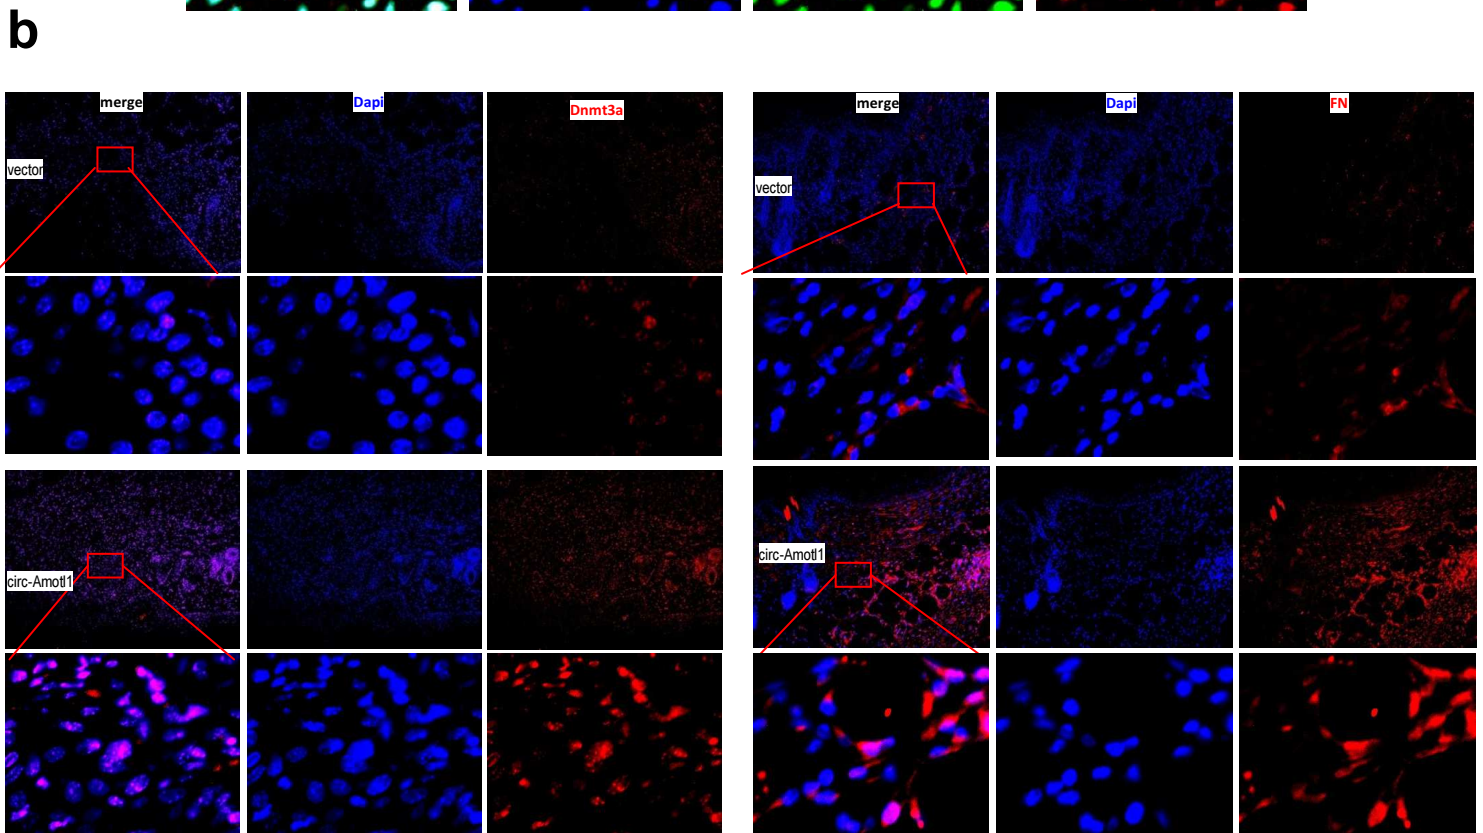

**Fig S4. Delivery of circ-Amotl1 in wound tissues increased expression of Stat3, Dnmt3a and fibronectin**

(a) The mock- and circ-Amotl1-injected tissues were stained with DAPI (blue), Stat3 (green), and circ-Amotl1 (red). High intensity of Stat3 and circ-Amotl1 were detected in the nuclei.

(b) The mock- and circ-Amotl1-transfected injected tissues were stained with DAPI and Dnmt3a (red, left) or fibronectin (red, right). High intensity of Stat3 and fibronectin were detected in the circ-Amotl1-injected tissues.

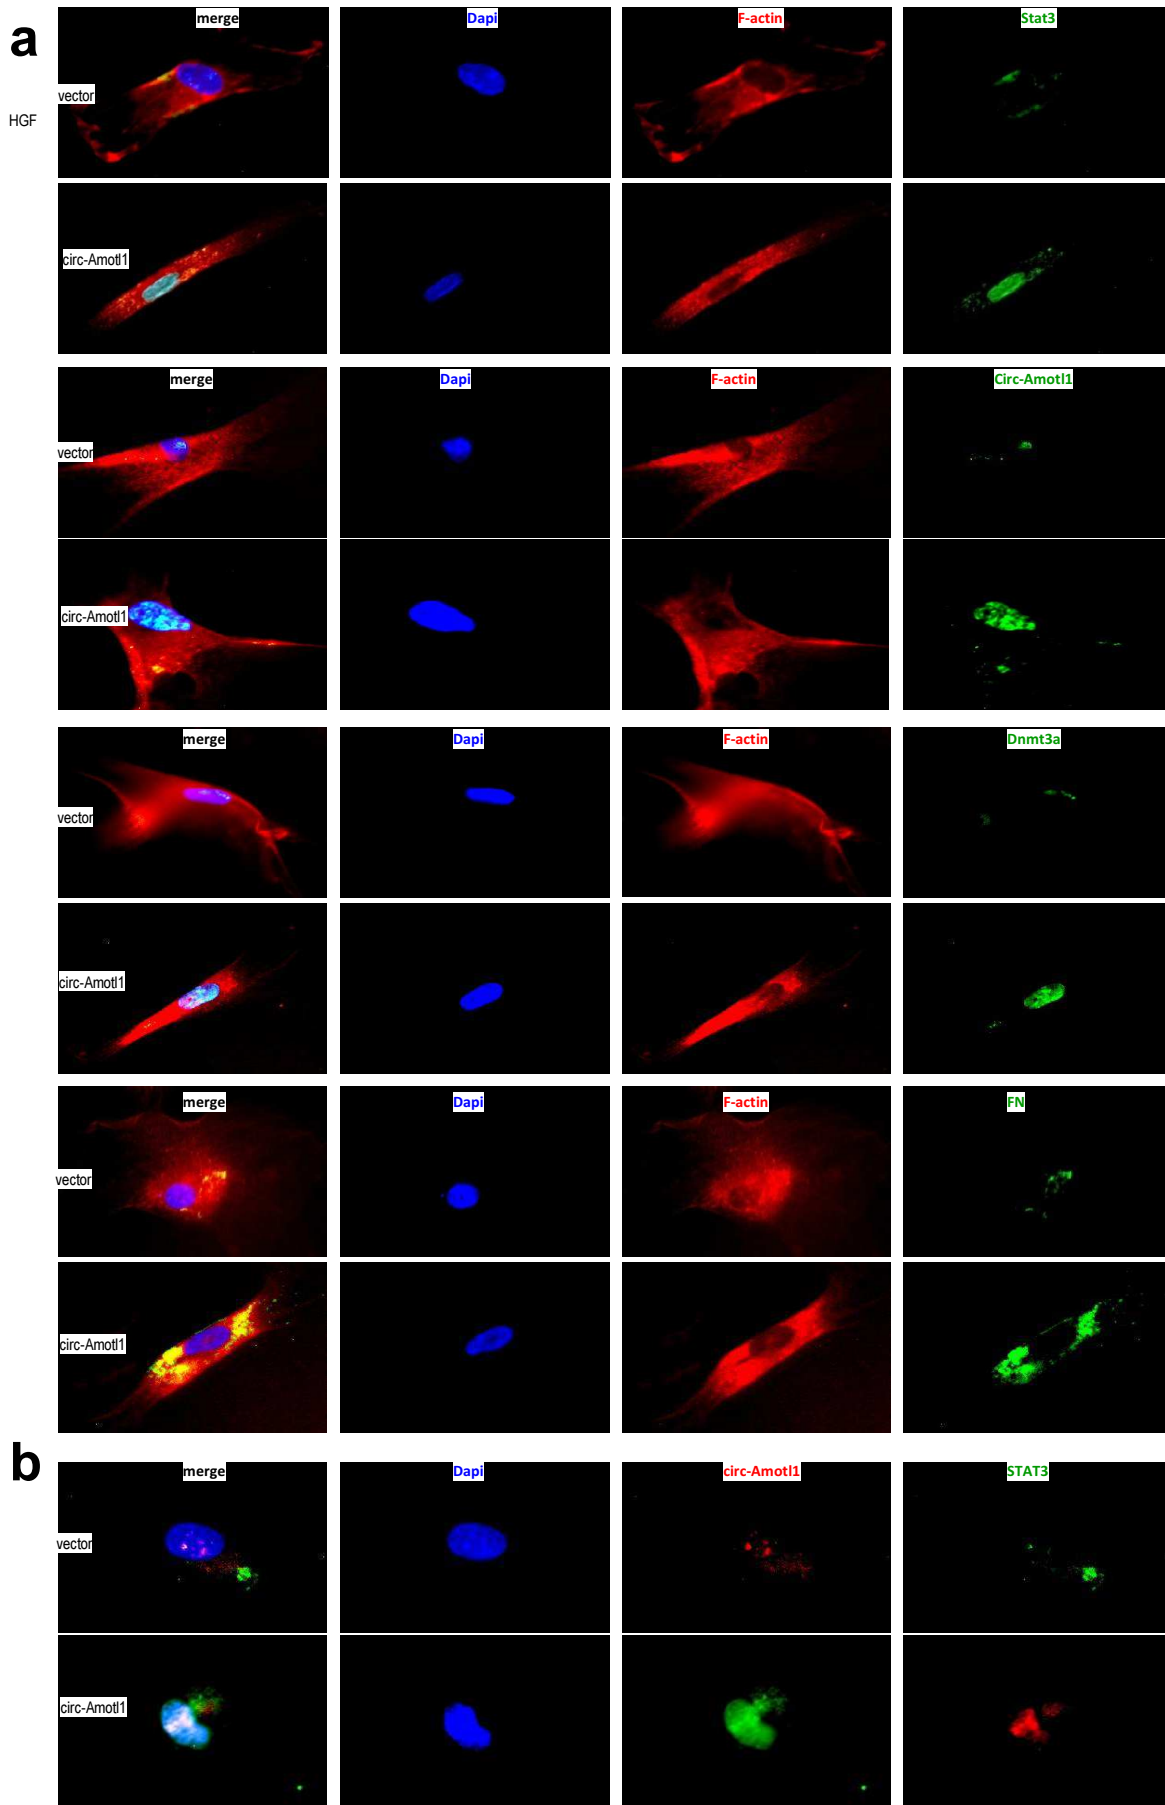

Fig S5. Expression of circ-Amot1 in HGF cells increased expression of Stat3, Dnmt3a and fibronectin. (a) The mock- and circ-Amot1-transfected HGF cells were stained with DAPI (blue), F-actin (red) and Stat3, Dnmt3a, fibronectin, or in situ hybridized with circ-Amot1 (green). Increased expression of these molecules was detected in the circ-Amot1-transfected cells. (b) The cells were stained with DAPI (blue), circ-Amot1 (green), and Stat3 (red). Co-localization of circ-Amot1 and Stat3 was detected in the circ-Amot1-transfected cells.

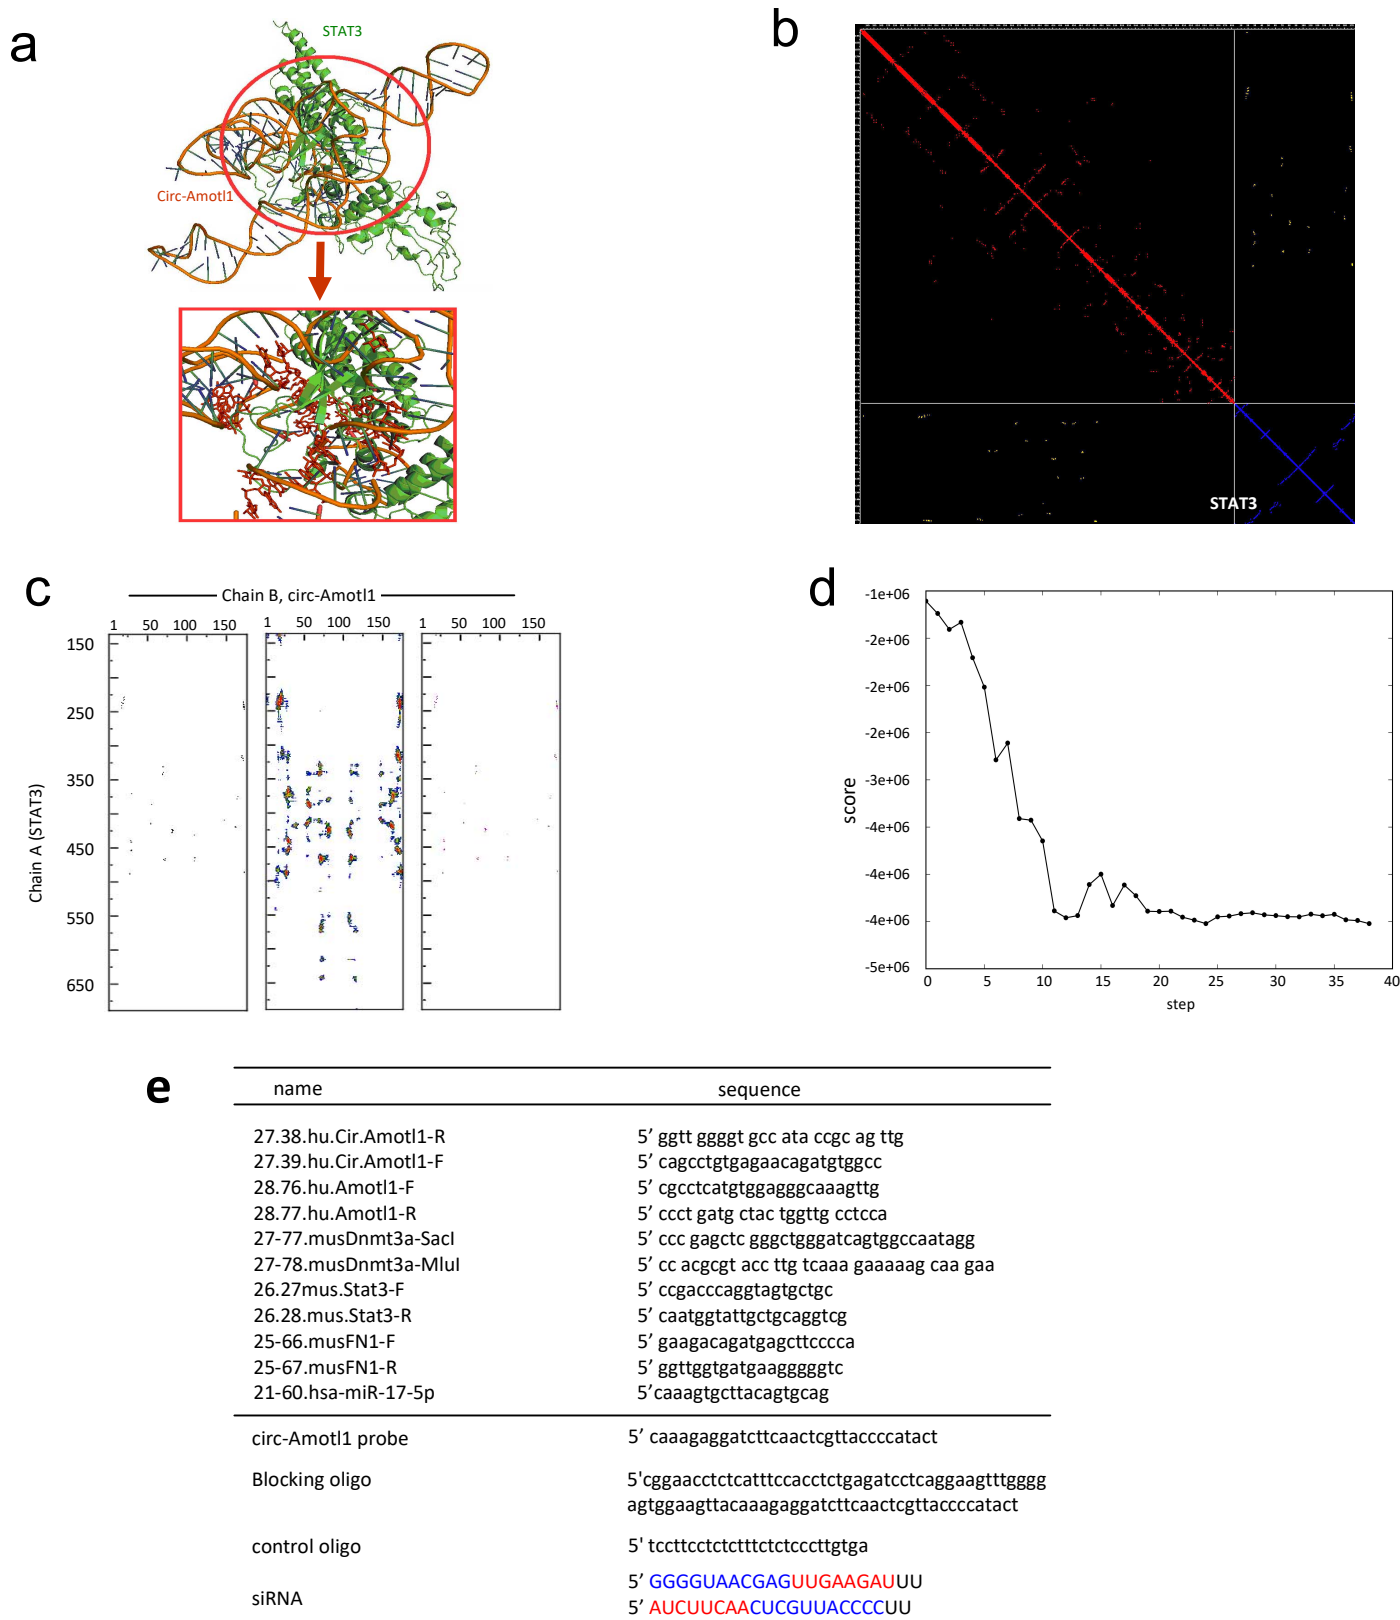

**Fig S6. Computational analysis of circ-Amot1 interacting with Stat3**

- (a) Graphic three-dimensional structures of the docking models of circ-Amot1 with Stat3.  
 (b) The contact map in the binding residues between circ-Amot1 and Stat3.  
 (c) The residue-level resolution contact maps in the binding residues between circ-Amot1 and Stat3.  
 (d) Refinement of the best docked circ-Amot1-Stat3 model showing MC score vs. steps of simulation.  
 (e) Primer sequences used for the study.



Table S1. The circ-Amotl1-STAT3 Distance

| N(res No) | atom | chain | AA (res No) | atom | chain | distance | type      |
|-----------|------|-------|-------------|------|-------|----------|-----------|
| LYS 140   | NZ   | A     | A 18        | O3'  | B     | 2.3      | Phil phil |
| LYS 140   | NZ   | A     | A 19        | OP1  | B     | 2.75     | Phil phil |
| GLU 229   | O    | A     | U 21        | OP1  | B     | 3.47     | Phil phil |
| TYR 230   | O    | A     | C 20        | OP2  | B     | 1.69     | Phil phil |
| TYR 230   | OH   | A     | A 19        | O2'  | B     | 2.02     | Phil phil |
| LYS 233   | CD   | A     | C 20        | O3'  | B     | 2.37     | Phil phil |
| LYS 233   | CE   | A     | U 21        | OP2  | B     | 0.33     | Phil phil |
| THR 234   | N    | A     | C 20        | OP2  | B     | 2.44     | Phil phil |
| THR 234   | OG1  | A     | A 19        | O3'  | B     | 2.6      | Phil phil |
| THR 236   | O    | A     | A 170       | O4'  | B     | 1.47     | Phil phil |
| ASP 237   | OD1  | A     | A 170       | OP1  | B     | 2.74     | Phil phil |
| ASP 237   | O    | A     | U 17        | OP2  | B     | 2.43     | Phil phil |
| GLU 238   | OE1  | A     | A 18        | O3'  | B     | 2.83     | Phil phil |
| GLU 238   | OE2  | A     | C 20        | OP1  | B     | 3.1      | Phil phil |
| GLU 238   | OE1  | A     | A 19        | C5'  | B     | 0.84     | Phil phil |
| LEU 240   | O    | A     | A 170       | N3   | B     | 1.51     | Phob phil |
| ALA 241   | CB   | A     | A 170       | O2'  | B     | 1.58     | Phob phil |
| ALA 241   | O    | A     | A 171       | O4'  | B     | 3.42     | Phob phil |
| ASP 242   | OD1  | A     | U 17        | C2   | B     | 1.39     | Phil phil |
| TRP 243   | CE3  | A     | A 170       | N1   | B     | 1.95     | Phil phil |
| TRP 243   | CZ3  | A     | A 171       | N1   | B     | 2.86     | Phil phil |
| LYS 244   | CB   | A     | A 171       | C4   | B     | 1.42     | Phil phil |
| LYS 244   | CG   | A     | A 170       | C2   | B     | 1.68     | Phil phil |
| ARG 245   | CB   | A     | U 17        | C5   | B     | 3.28     | Phil phil |
| ARG 245   | N    | A     | A 171       | N3   | B     | 3.3      | Phil phil |
| GLN 247   | OE1  | A     | A 171       | N1   | B     | 2.76     | Phil phil |
| GLN 248   | OE1  | A     | A 171       | O2'  | B     | 3        | Phil phil |
| ASN 315   | OD1  | A     | G 168       | O3'  | B     | 2.57     | Phil phil |
| ASN 315   | OD1  | A     | U 169       | OP1  | B     | 1.96     | Phil phil |
| LYS 318   | NZ   | A     | G 168       | C4'  | B     | 2.08     | Phil phil |
| SER 319   | OG   | A     | U 169       | O3'  | B     | 3.41     | Phil phil |
| SER 319   | OG   | A     | A 170       | OP1  | B     | 3.48     | Phil phil |
| VAL 322   | CG1  | A     | A 170       | N6   | B     | 3.39     | Phob phil |
| MET 331   | SD   | A     | U 69        | O2'  | B     | 2.52     | Phob phil |
| HIS 332   | CE1  | A     | C 70        | C5'  | B     | 2.74     | Phil phil |
| HIS 332   | NE2  | A     | U 69        | O3'  | B     | 2.96     | Phil phil |
| LYS 340   | NZ   | A     | C 70        | OP2  | B     | 2.41     | Phil phil |
| GLY 342   | O    | A     | U 69        | OP1  | B     | 2.84     | Phob phil |
| VAL 343   | CG2  | A     | U 69        | OP1  | B     | 1.97     | Phob phil |
| LYS 370   | CE   | A     | C 30        | OP2  | B     | 1.5      | Phil phil |
| LYS 370   | CB   | A     | C 29        | OP1  | B     | 3.01     | Phil phil |
| ASP 371   | OD2  | A     | C 30        | N4   | B     | 3.41     | Phil phil |
| SER 372   | OG   | A     | C 28        | OP2  | B     | 2.57     | Phil phil |
| VAL 373   | O    | A     | A 163       | OP2  | B     | 2.61     | Phob phil |
| ARG 379   | NH1  | A     | U 162       | OP1  | B     | 3.08     | Phil phil |
| ASN 385   | OD1  | A     | G 54        | OP1  | B     | 3        | Phil phil |

The table reporting a list of atoms "in contact" (within the distance cutoff) with relative distances less than 3.5Å.

Table S2. Accessible Surface Area table of circ-Amotl1-Stat3 complex

|                                                                    |        |
|--------------------------------------------------------------------|--------|
| Buried area upon the complex formation (Å <sup>2</sup> )           | 6316.2 |
| Buried area upon the complex formation (%)                         | 11.13  |
| Interface area (Å <sup>2</sup> )                                   | 3158.1 |
| Interface area STAT3 (%)                                           | 11.77  |
| Interface area circ-AMOTL1 (%)                                     | 10.56  |
| POLAR Buried area upon the complex formation (Å <sup>2</sup> )     | 2667.0 |
| POLAR Interface (%)                                                | 42.22  |
| POLAR Interface area (Å <sup>2</sup> )                             | 1333.5 |
| NON POLAR Buried area upon the complex formation (Å <sup>2</sup> ) | 3649.2 |
| NON POLAR Interface (%)                                            | 57.78  |
| NON POLAR Interface area (Å <sup>2</sup> )                         | 1824.6 |
| Residues at the interface_total (n)                                | 148    |
| Residues at the interface_STAT3                                    | 96     |
| Residues at the interface_circ-AMOTL1                              | 52     |

Table S1. The circ-Amotl1-STAT3 Distance (con.)

| N(res No) | atom | chain | AA (res No) | atom | chain | distance | type      |
|-----------|------|-------|-------------|------|-------|----------|-----------|
| ASN 385   | CB   | A     | U 55        | OP1  | B     | 3.19     | Phil phil |
| LEU 387   | CD2  | A     | U 55        | OP2  | B     | 3.37     | Phob phil |
| HIS 410   | ND1  | A     | C 146       | O2'  | B     | 2.84     | Phil phil |
| ARG 414   | NH1  | A     | G 54        | OP2  | B     | 2.78     | Phil phil |
| GLU 415   | O    | A     | G 54        | OP1  | B     | 3.45     | Phil phil |
| GLN 416   | CD   | A     | A 160       | OP1  | B     | 2.69     | Phil phil |
| GLY 419   | CA   | A     | A 160       | O2'  | B     | 2.45     | Phob phil |
| ASN 420   | N    | A     | A 160       | O2'  | B     | 2.73     | Phil phil |
| ASN 420   | ND2  | A     | G 161       | C4'  | B     | 0.4      | Phil phil |
| ARG 423   | NH1  | A     | G 80        | C4'  | B     | 1.61     | Phil phil |
| ARG 423   | O    | A     | G 81        | C5'  | B     | 2.04     | Phil phil |
| ASN 425   | O    | A     | G 81        | C4'  | B     | 2.35     | Phil phil |
| ASN 425   | N    | A     | C82         | OP1  | B     | 3.44     | Phil phil |
| CYS 426   | CA   | A     | G 81        | O2'  | B     | 3.07     | Phil phil |
| ALA 428   | CB   | A     | G 80        | O2'  | B     | 3.22     | Phob phil |
| ALA 428   | N    | A     | G 81        | O4'  | B     | 3.15     | Phob phil |
| ILE 431   | CG2  | A     | G 107       | O2'  | B     | 2.73     | Phob phil |
| VAL 432   | CG1  | A     | U 109       | OP2  | B     | 3.35     | Phob phil |
| VAL 432   | CG2  | A     | A 108       | O3'  | B     | 2.92     | Phob phil |
| LEU 438   | CD1  | A     | C 28        | C5'  | B     | 1.69     | Phob phil |
| THR 440   | OG1  | A     | C 28        | O3'  | B     | 2.48     | Phil phil |
| THR 440   | CG2  | A     | C 29        | C5'  | B     | 1.57     | Phil phil |
| GLU 442   | OE1  | A     | C 30        | OP1  | B     | 0.43     | Phil phil |
| GLU 442   | CD   | A     | C 29        | O3'  | B     | 1.94     | Phil phil |
| ASP 453   | OD2  | A     | C 30        | O2'  | B     | 3.05     | Phil phil |
| GLU 455   | OE1  | A     | C 30        | C6   | B     | 3.26     | Phil phil |
| GLU 455   | OE2  | A     | C 29        | O4'  | B     | 0.48     | Phil phil |
| HIS 457   | ND1  | A     | C 28        | O2'  | B     | 2.38     | Phil phil |
| SER 465   | OG   | A     | C 110       | OP1  | B     | 2.94     | Phil phil |
| SER 465   | OG   | A     | U 109       | OP2  | B     | 3.13     | Phil phil |
| ASN 466   | ND2  | A     | G 72        | O6   | B     | 2.63     | Phil phil |
| ILE 467   | CG2  | A     | C 71        | OP2  | B     | 0.47     | Phob phil |
| ILE 467   | CD1  | A     | C 70        | OP1  | B     | 1.8      | Phob phil |
| CYS 468   | CB   | A     | G 72        | OP2  | B     | 3.04     | Phil phil |
| CYS 468   | N    | A     | C 71        | OP2  | B     | 3        | Phil phil |
| GLN 469   | NE2  | A     | U 109       | OP1  | B     | 1.31     | Phil phil |
| GLN 469   | NE2  | A     | A 108       | O3'  | B     | 3.23     | Phil phil |
| ASN 485   | O    | A     | C 172       | P    | B     | 2.4      | Phil phil |
| ASN 485   | O    | A     | A 171       | O3'  | B     | 1.63     | Phil phil |
| ASN 486   | CA   | A     | C 172       | OP2  | B     | 1.18     | Phil phil |
| ASN 486   | CA   | A     | A 171       | O3'  | B     | 3.23     | Phil phil |
| PRO 487   | N    | A     | C 172       | OP1  | B     | 1.05     | Phob phil |
| PRO 487   | CD   | A     | A 171       | O3'  | B     | 2.44     | Phob phil |
| LYS 488   | CD   | A     | C 28        | O4'  | B     | 3.04     | Phob phil |
| LYS 488   | NZ   | A     | U 27        | C2   | B     | 0.49     | Phil phil |
| LYS 488   | NZ   | A     | C 172       | O2'  | B     | 3.18     | Phil phil |
| ASN 489   | N    | A     | U 27        | O2'  | B     | 3.26     | Phil phil |

Table S3. circ-Amotl1-Stat3 interaction overview

|                                               |    |
|-----------------------------------------------|----|
| Number of interacting residues STAT3          | 60 |
| Number of interacting residues circ-AMOTL1    | 32 |
| Number of hydrophilic-hydrophobic interaction | 20 |
| Number of hydrophilic-hydrophilic interaction | 73 |
| Number of hydrophobic-hydrophobic interaction | 0  |
